# Supplementary material for: Significance of Algal Polymer in Designing Amphotericin B Nanoparticles
Source: Hindawi journal article supplement (doi:10.1155/2014/564573), 2014-01-01
Supplement: f1 [file 564573.f1.pdf]

## GRAPHICAL ABSTRACT

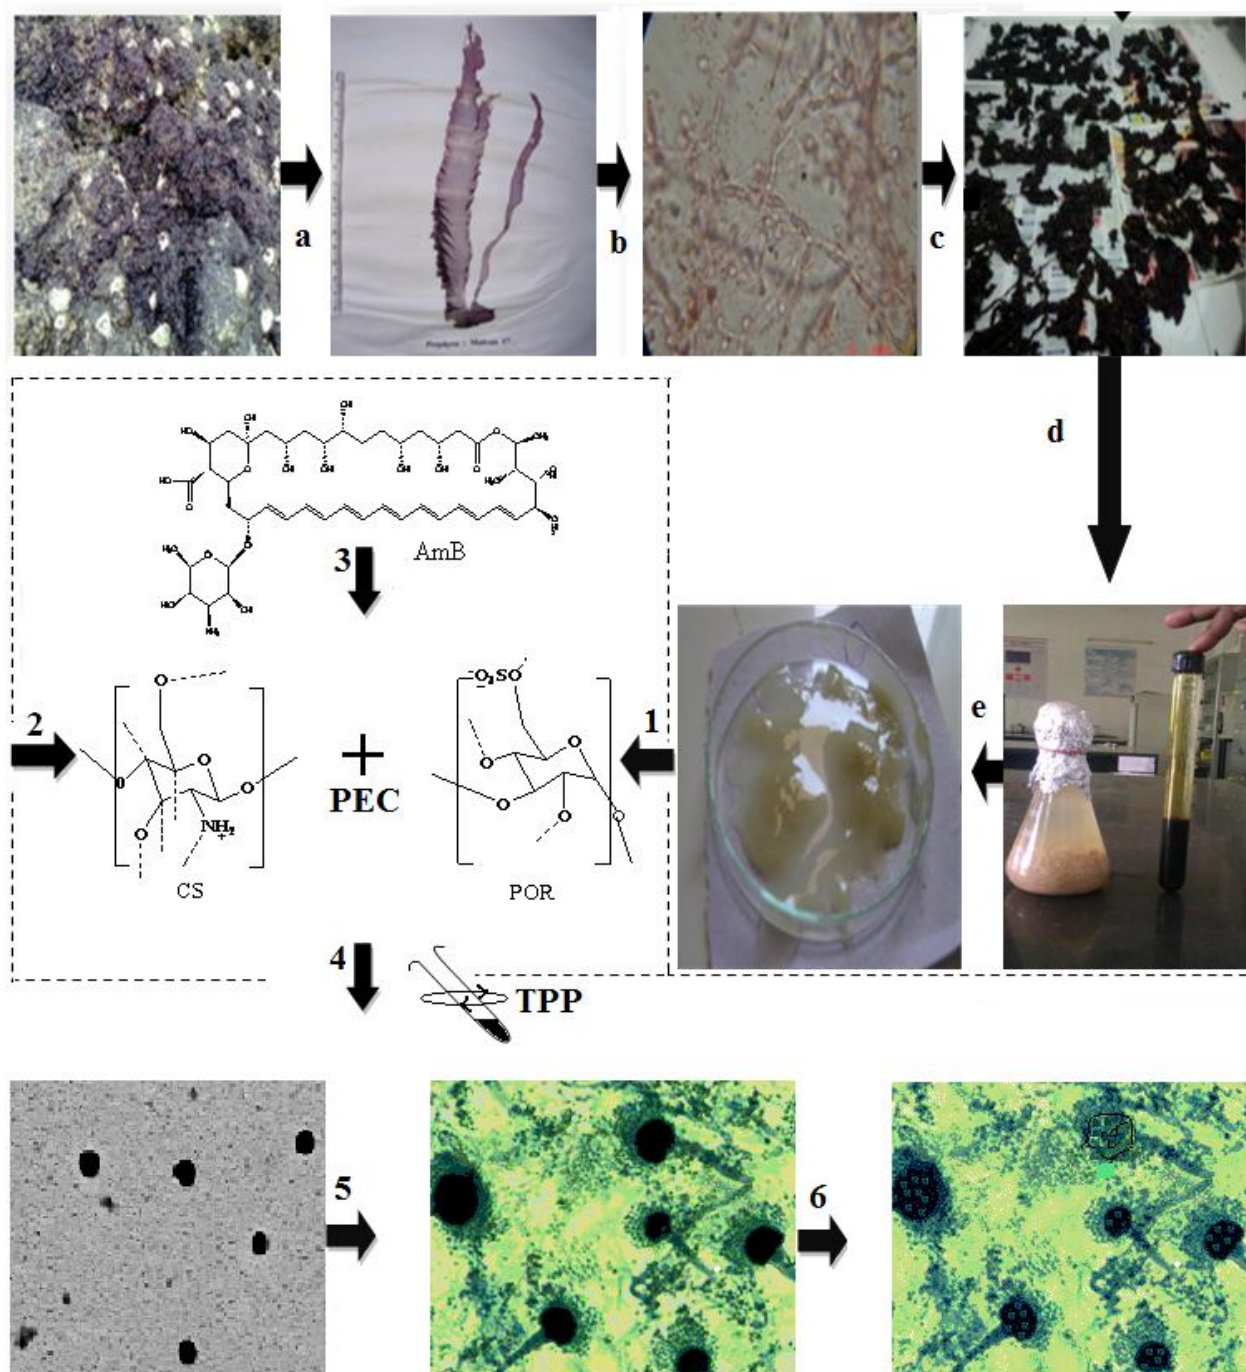

*Porphyra* from rock (a) was collected and identified macroscopically (b) and microscopically (c). After hot air drying *Porphyra* was alkali hydrolyzed (d) and Porphyran, POR (porphyran) was isolated. By using POR (e) as negative (1) and chitosan (CS) as positive polymer (2) stable AmB (3) nanoparticles were developed by PEC (polyelectrolyte complexation technique) in the presence of TPP(4). These NPs causes lysis of fungi (5&6) as illustrated above.
